# Supplementary material
Source: ML conference proceedings conference paper supplement (https://aclanthology.org/2026.semeval-1.324)

BERTScore F1

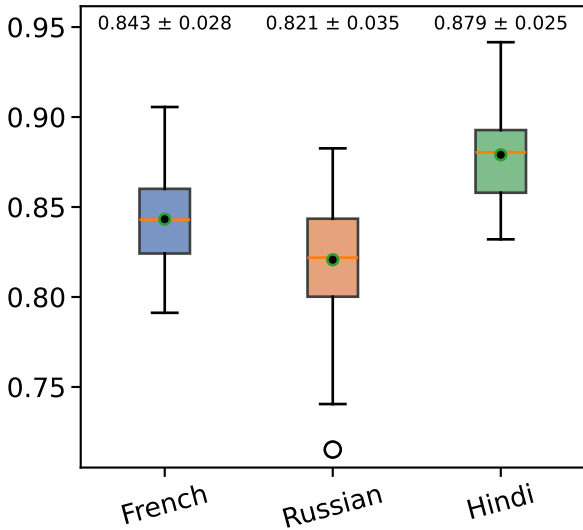

Supplement: SupplementaryMaterial [file bert_similarity_boxplot.pdf › latex/fig/bert_similarity_boxplot.pdf]

# Dataset distribution

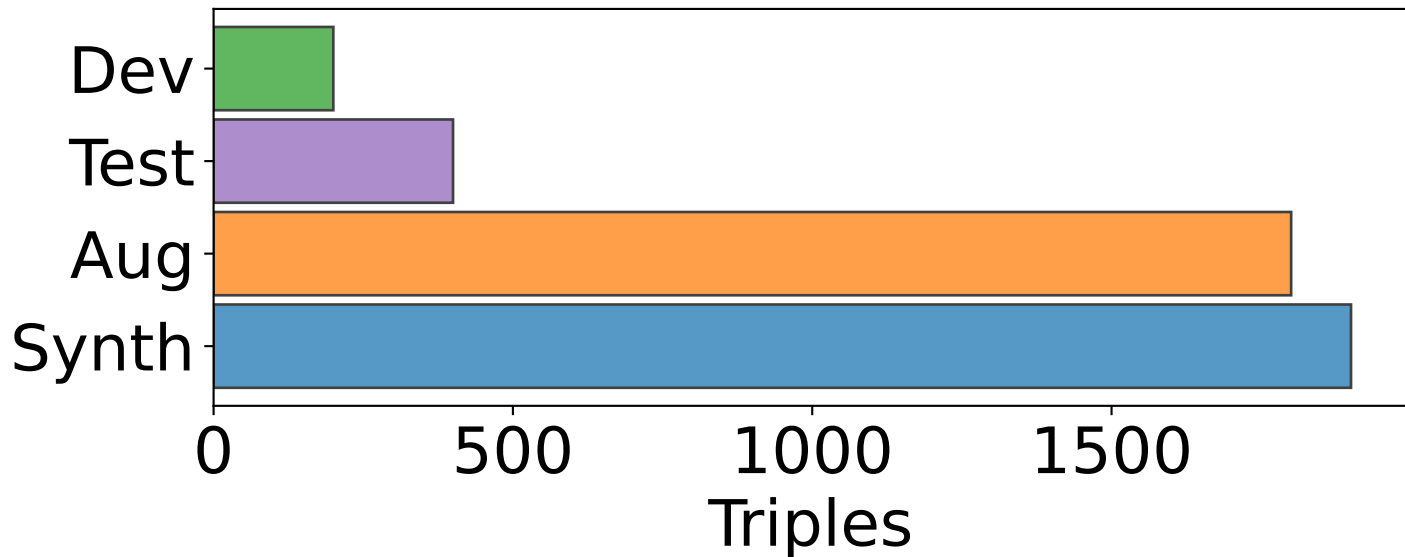

Supplement: SupplementaryMaterial [file dataset_dist.pdf › latex/fig/dataset_dist.pdf]

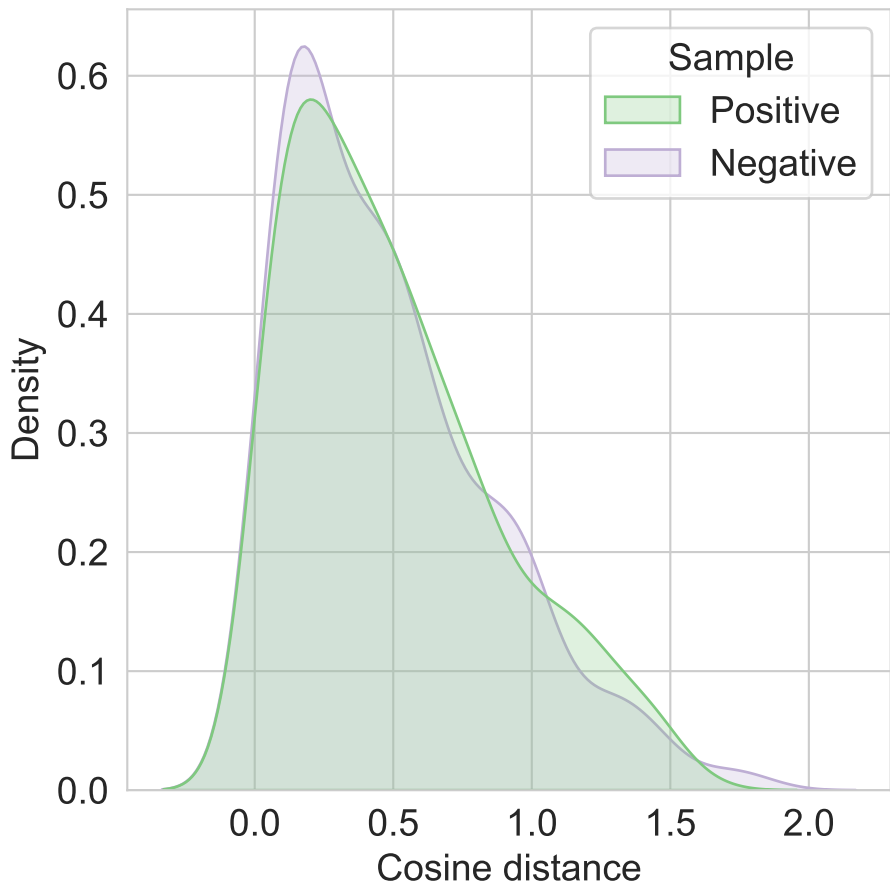

Supplement: SupplementaryMaterial [file distances_deep_mlp_triplet_aug_dev_testTrackA_embeddings_with_labels.pdf › latex/fig/dist/distances_deep_mlp_triplet_aug_dev_testTrackA_embeddings_with_labels.pdf]

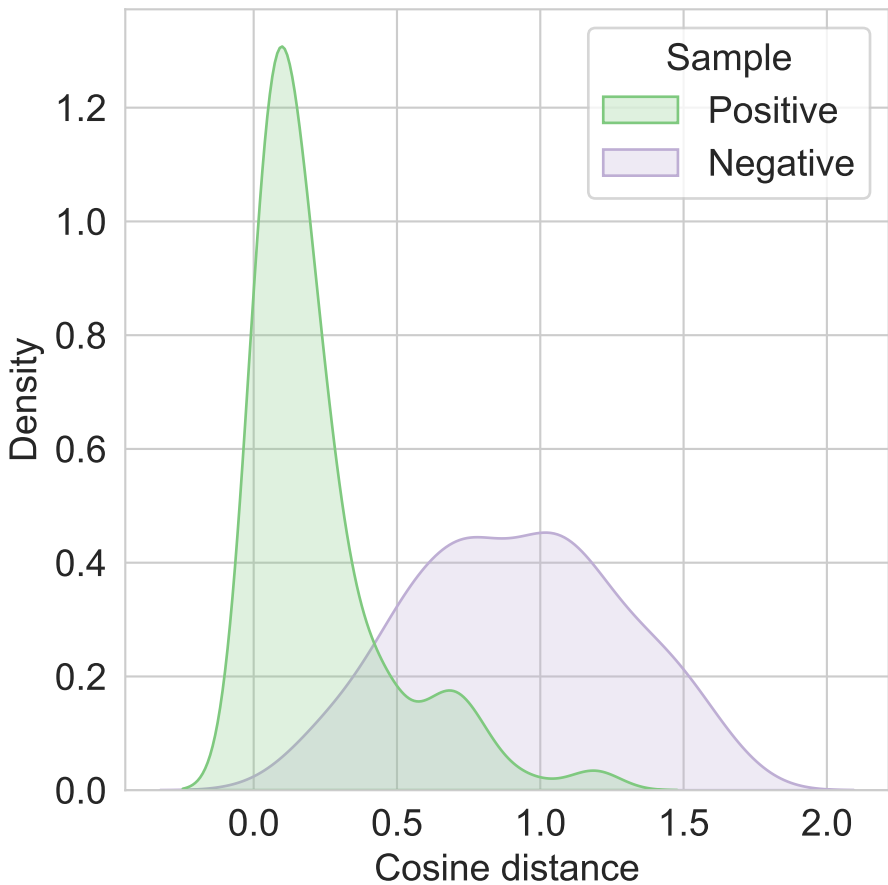

Supplement: SupplementaryMaterial [file distances_deep_mlp_triplet_aug_dev_trackA_embeddings_with_labels.pdf › latex/fig/dist/distances_deep_mlp_triplet_aug_dev_trackA_embeddings_with_labels.pdf]

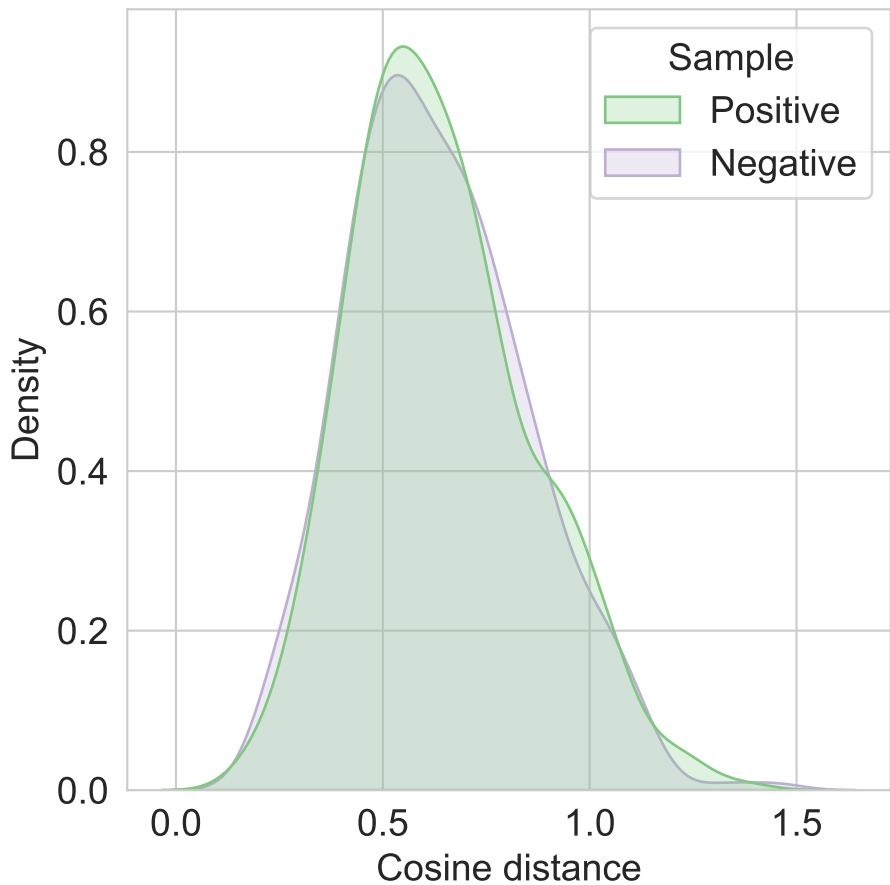

Supplement: SupplementaryMaterial [file distances_linear_triplet_aug_dev_testTrackA_embeddings_with_labels.pdf › latex/fig/dist/distances_linear_triplet_aug_dev_testTrackA_embeddings_with_labels.pdf]

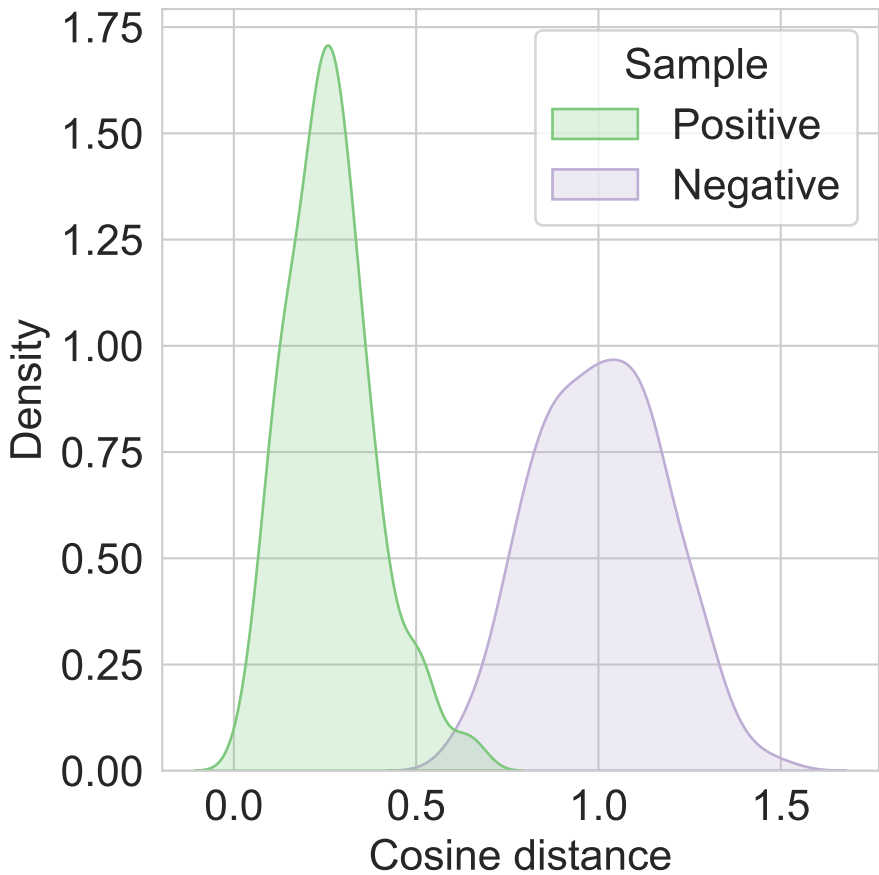

Supplement: SupplementaryMaterial [file distances_linear_triplet_aug_dev_trackA_embeddings_with_labels.pdf › latex/fig/dist/distances_linear_triplet_aug_dev_trackA_embeddings_with_labels.pdf]

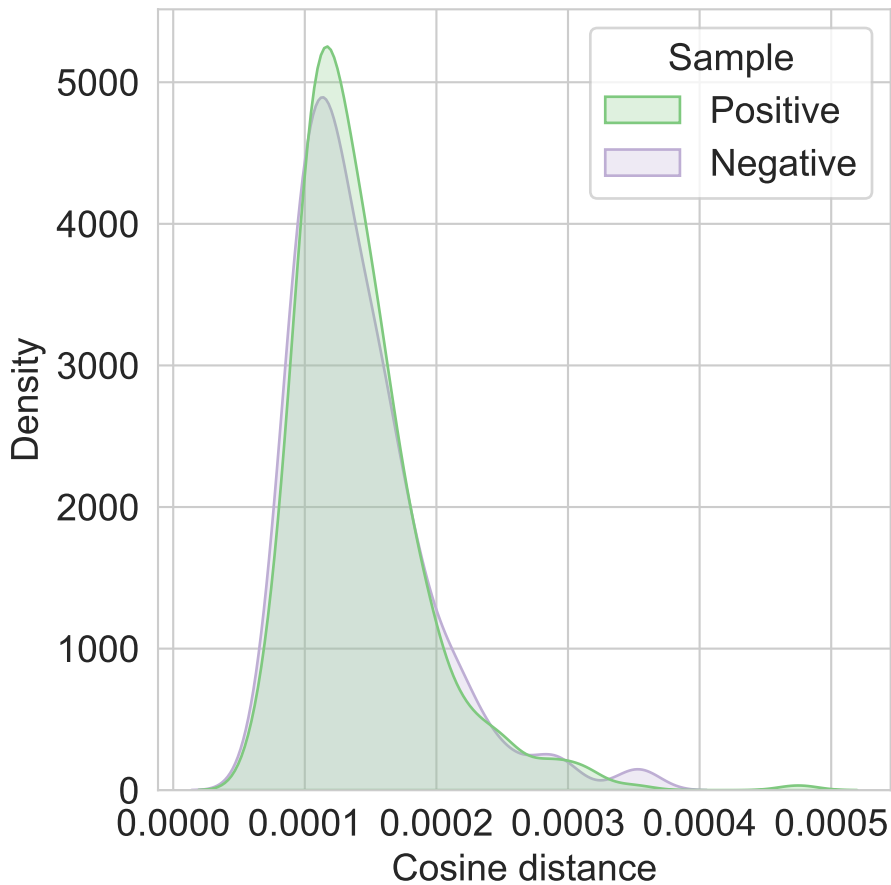

Supplement: SupplementaryMaterial [file distances_lstm_multitask_hardtriplet_aug_dev_testTrackA_embeddings_with_labels.pdf › latex/fig/dist/distances_lstm_multitask_hardtriplet_aug_dev_testTrackA_embeddings_with_labels.pdf]

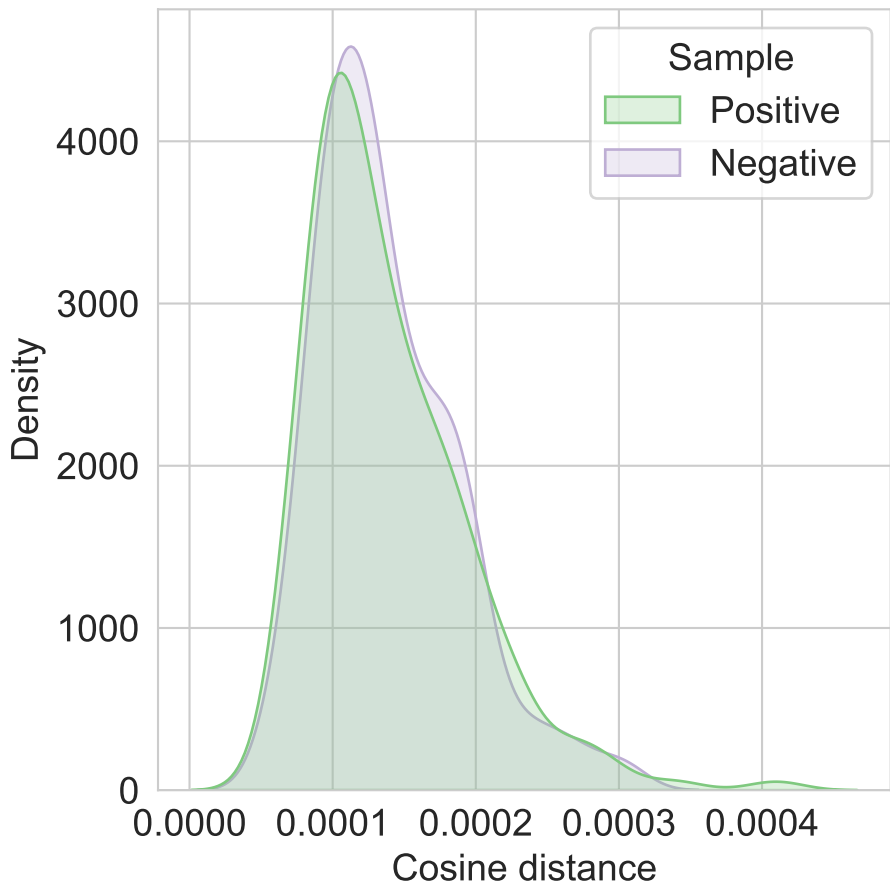

Supplement: SupplementaryMaterial [file distances_lstm_multitask_hardtriplet_aug_dev_trackA_embeddings_with_labels.pdf › latex/fig/dist/distances_lstm_multitask_hardtriplet_aug_dev_trackA_embeddings_with_labels.pdf]

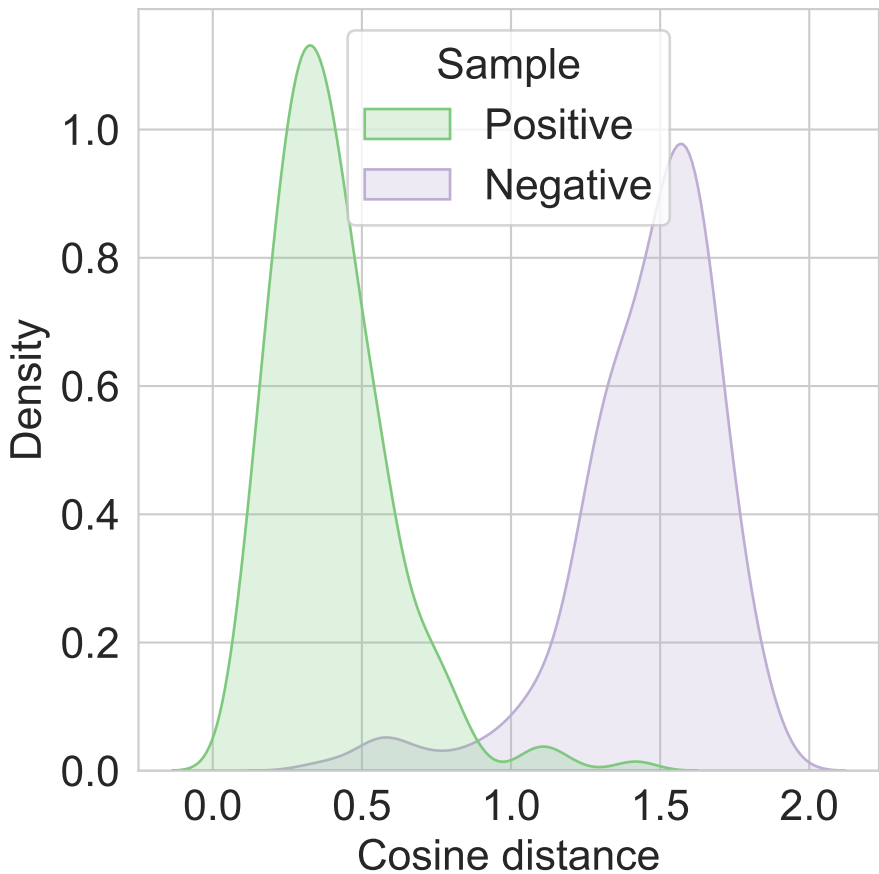

Supplement: SupplementaryMaterial [file distances_lstm_triplet_aug_dev_trackA_embeddings_with_labels.pdf › latex/fig/dist/distances_lstm_triplet_aug_dev_trackA_embeddings_with_labels.pdf]

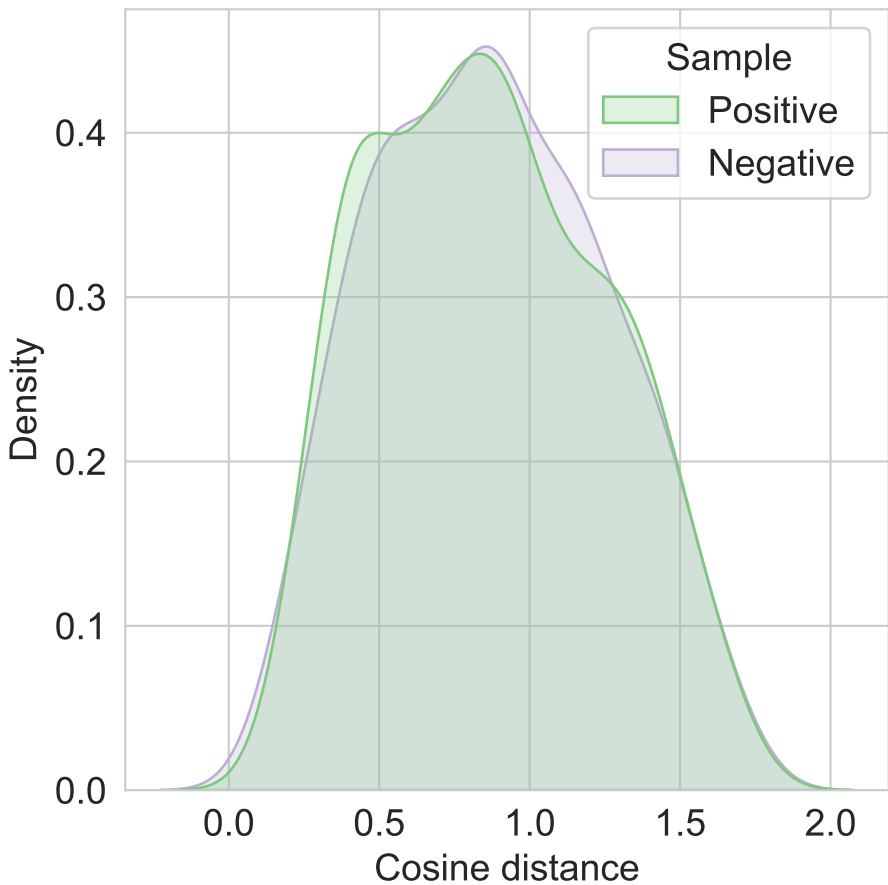

Supplement: SupplementaryMaterial [file distances_lstm_triplet_synaug_dev_testTrackA_embeddings_with_labels.pdf › latex/fig/dist/distances_lstm_triplet_synaug_dev_testTrackA_embeddings_with_labels.pdf]

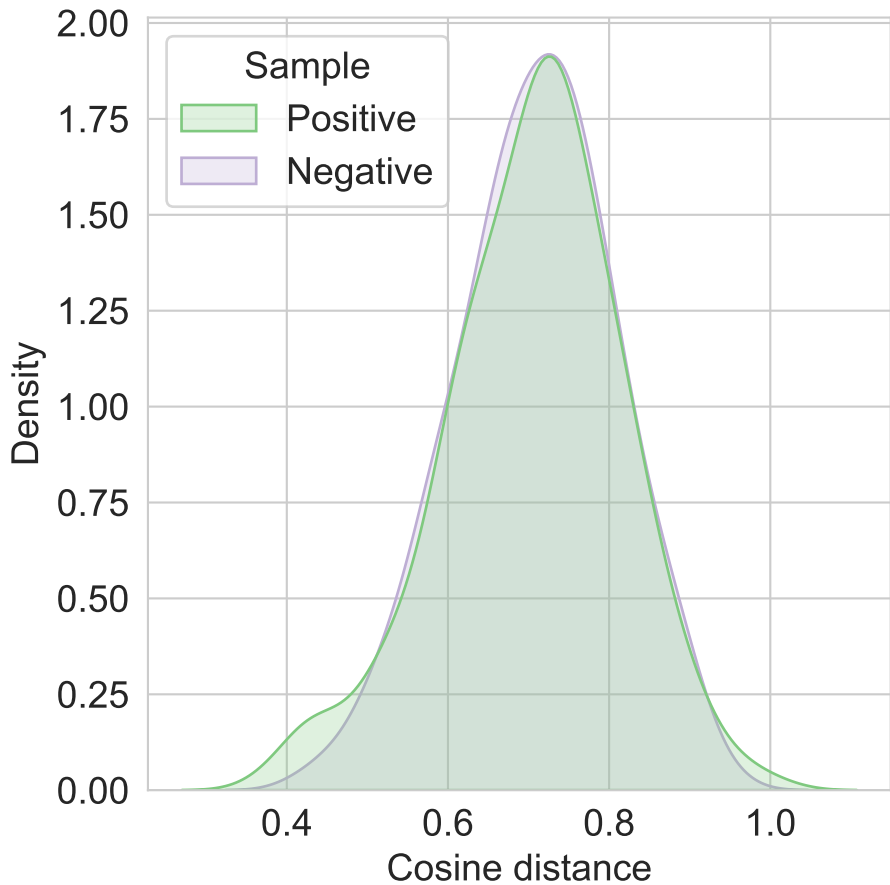

Supplement: SupplementaryMaterial [file distances_sbert_all-MiniLM-L12-v2_trackA_embeddings_with_labels.pdf › latex/fig/dist/distances_sbert_all-MiniLM-L12-v2_trackA_embeddings_with_labels.pdf]

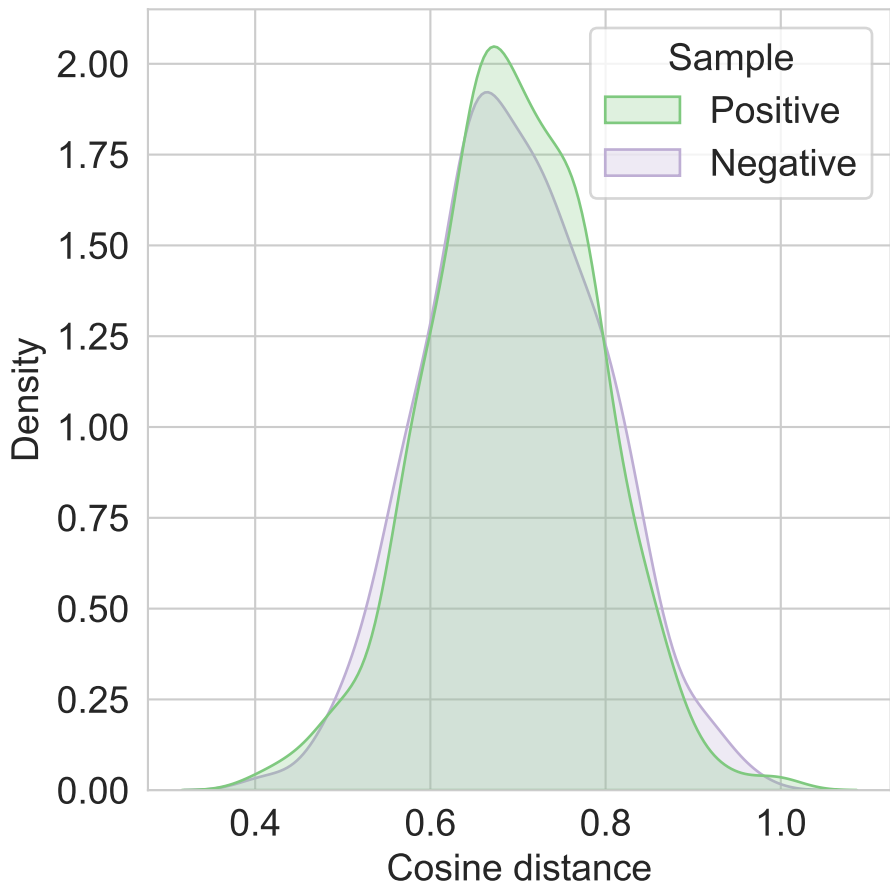

Supplement: SupplementaryMaterial [file distances_sbert_all-MiniLM-L6-v2_testTrackA_embeddings_with_labels.pdf › latex/fig/dist/distances_sbert_all-MiniLM-L6-v2_testTrackA_embeddings_with_labels.pdf]

- + Anchor
- Positive
- × Negative

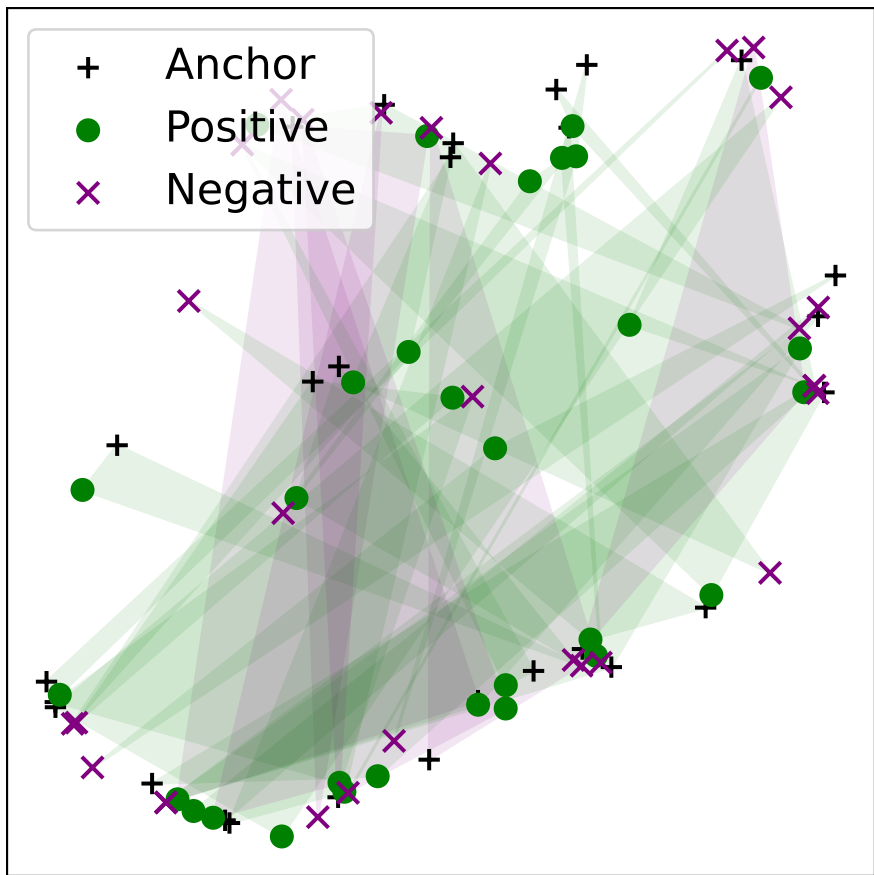

Supplement: SupplementaryMaterial [file embeddings_deep_mlp_triplet_aug_dev_trackA_embeddings_with_labels.pdf › latex/fig/emb/embeddings_deep_mlp_triplet_aug_dev_trackA_embeddings_with_labels.pdf]

- + Anchor
- Positive
- × Negative

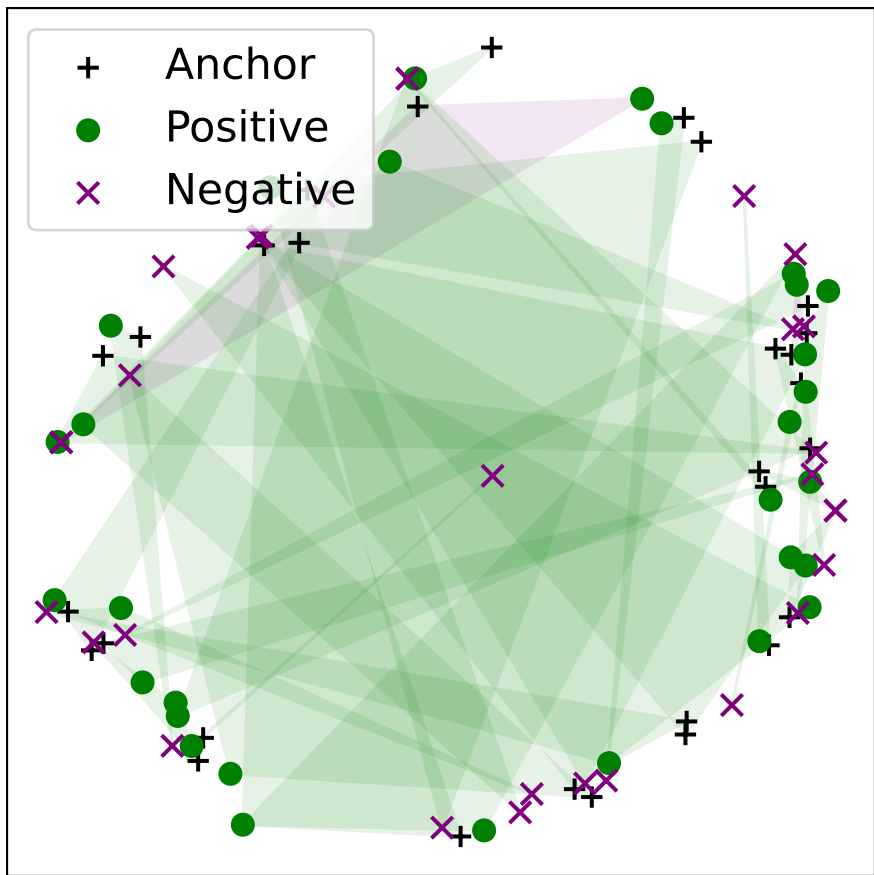

Supplement: SupplementaryMaterial [file embeddings_linear_triplet_aug_dev_trackA_embeddings_with_labels.pdf › latex/fig/emb/embeddings_linear_triplet_aug_dev_trackA_embeddings_with_labels.pdf]

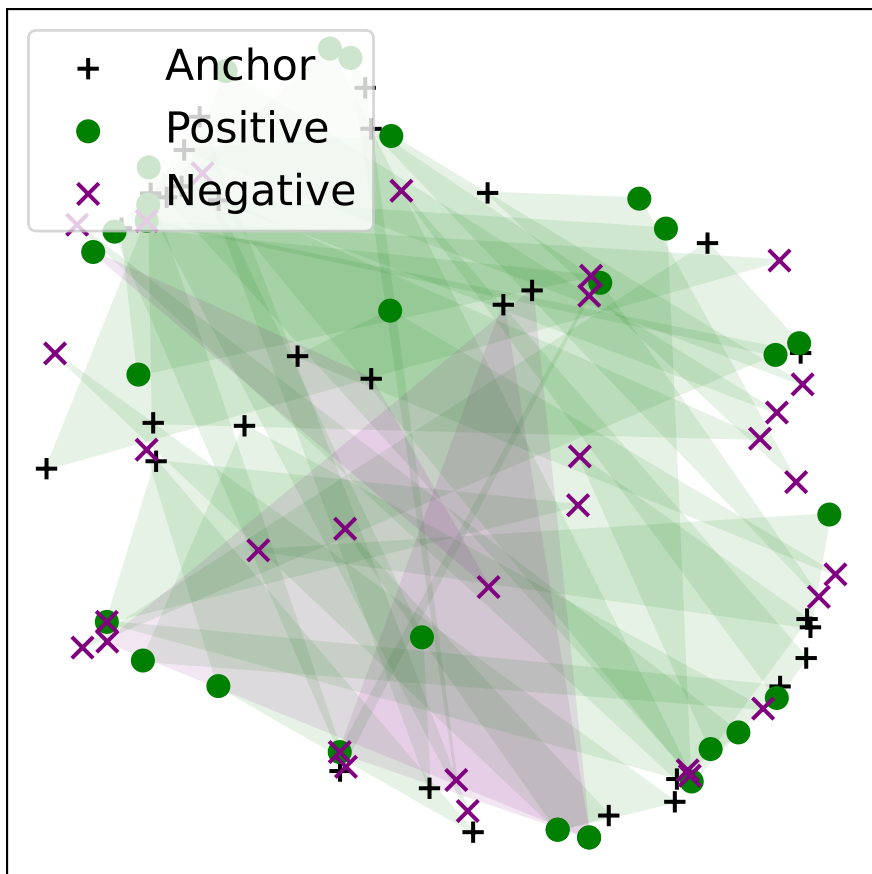

Supplement: SupplementaryMaterial [file embeddings_lstm_triplet_aug_dev_trackA_embeddings_with_labels.pdf › latex/fig/emb/embeddings_lstm_triplet_aug_dev_trackA_embeddings_with_labels.pdf]

- + Anchor
- Positive
- × Negative

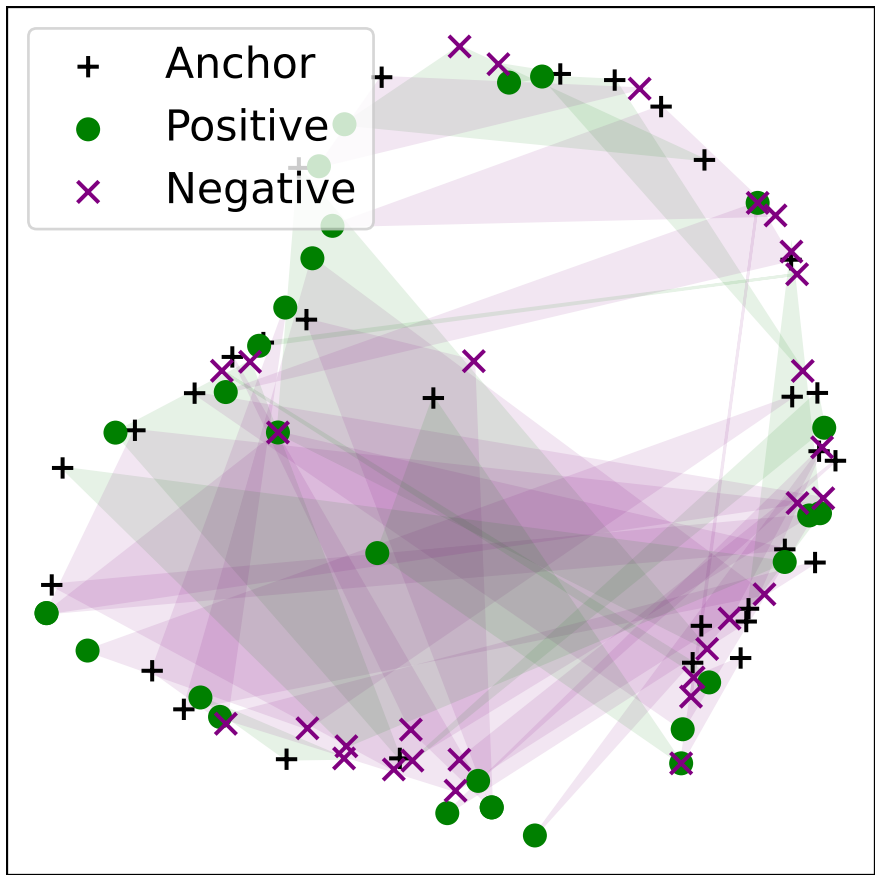

Supplement: SupplementaryMaterial [file embeddings_sbert_all-MiniLM-L12-v2_trackA_embeddings_with_labels.pdf › latex/fig/emb/embeddings_sbert_all-MiniLM-L12-v2_trackA_embeddings_with_labels.pdf]

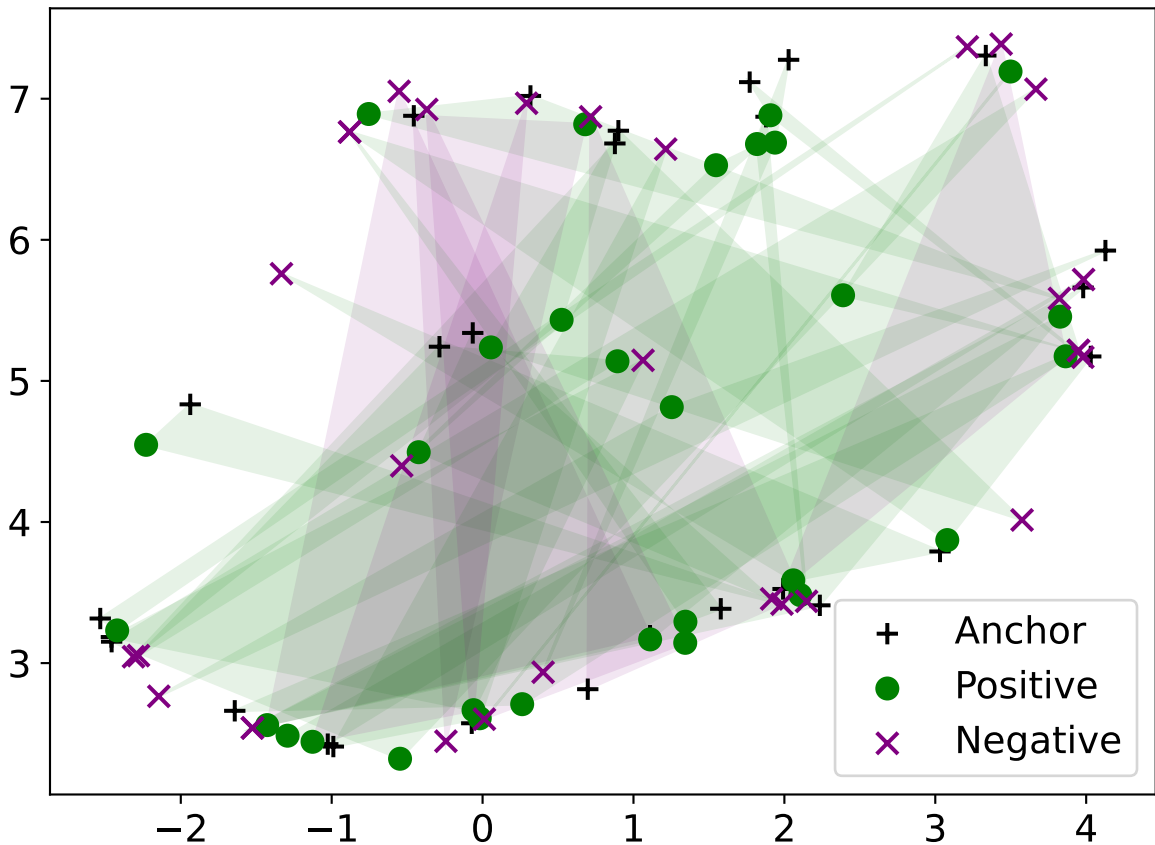

Supplement: SupplementaryMaterial [file embeddings_deep_mlp_triplet_aug_dev_trackA_embeddings_with_labels.pdf › latex/fig/embeddings_deep_mlp_triplet_aug_dev_trackA_embeddings_with_labels.pdf]

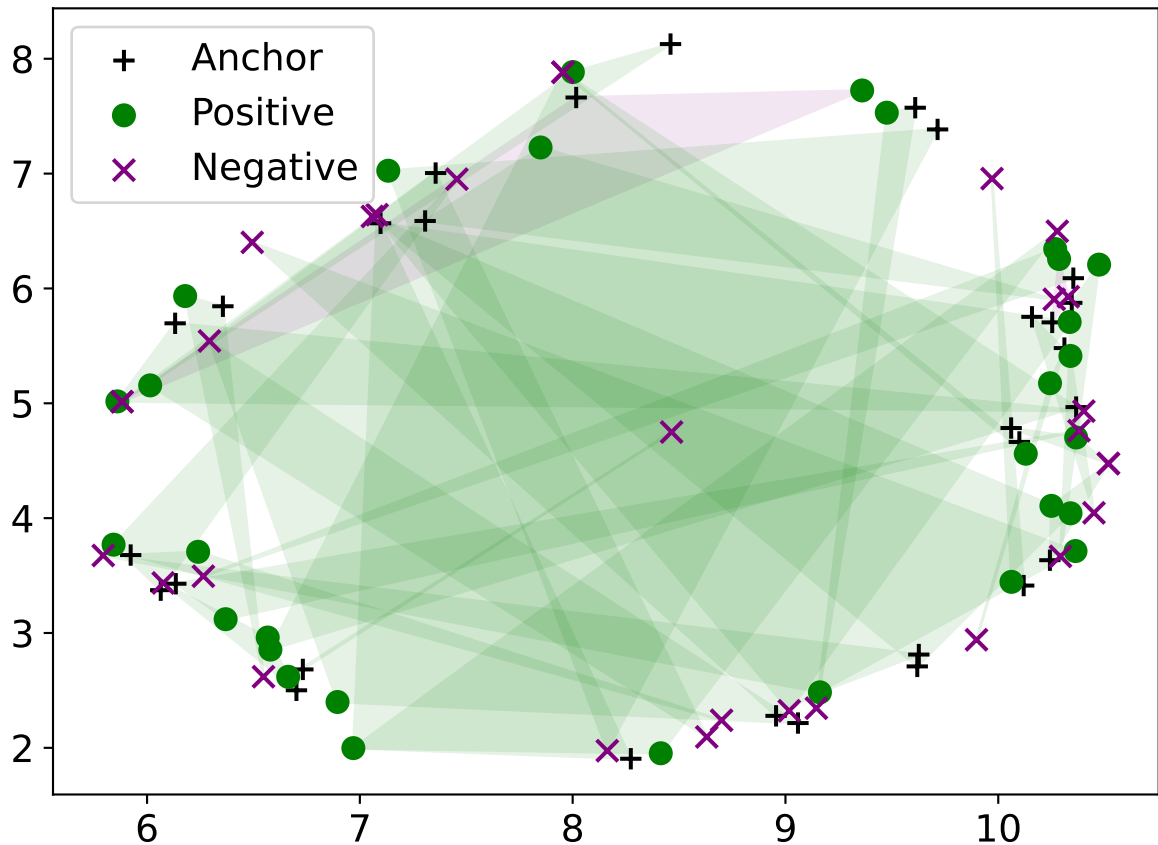

Supplement: SupplementaryMaterial [file embeddings_linear_triplet_aug_dev_trackA_embeddings_with_labels.pdf › latex/fig/embeddings_linear_triplet_aug_dev_trackA_embeddings_with_labels.pdf]

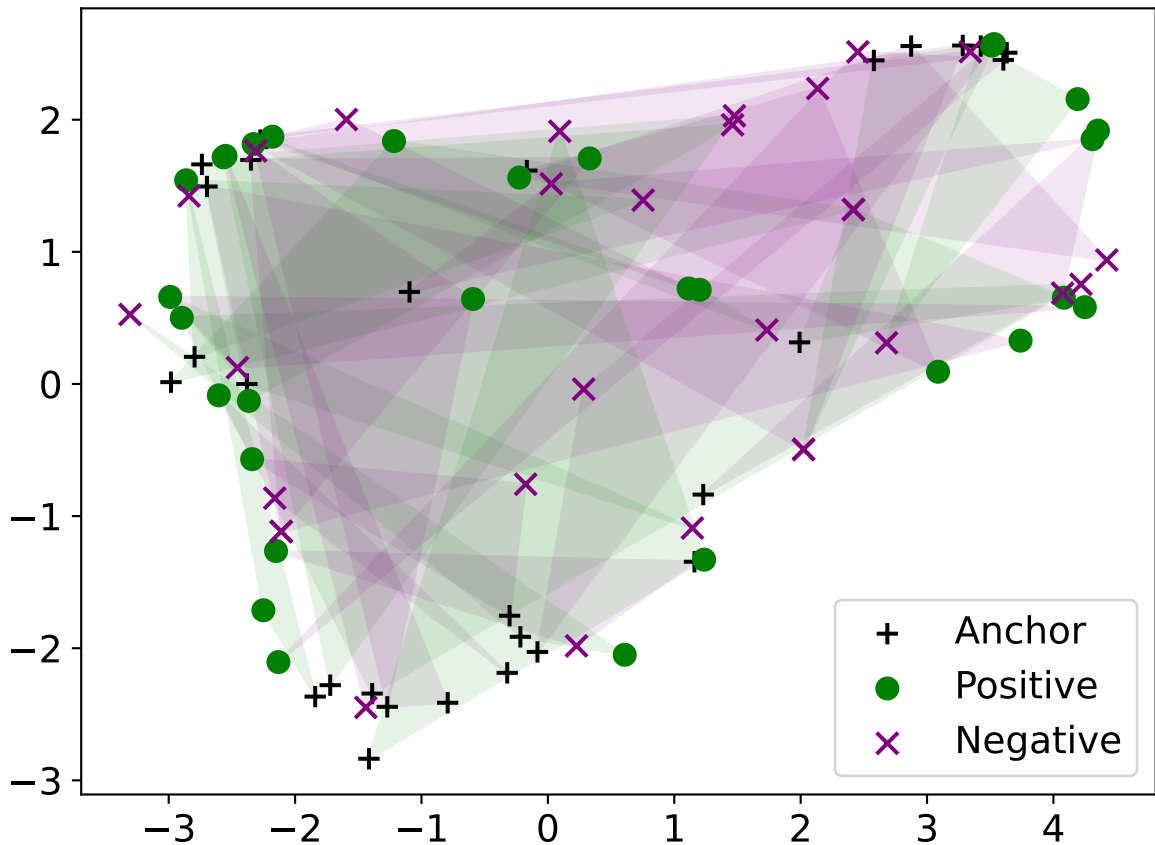

Supplement: SupplementaryMaterial [file embeddings_lstm_multitask_hardtriplet_aug_dev_trackA_embeddings_with_labels.pdf › latex/fig/embeddings_lstm_multitask_hardtriplet_aug_dev_trackA_embeddings_with_labels.pdf]

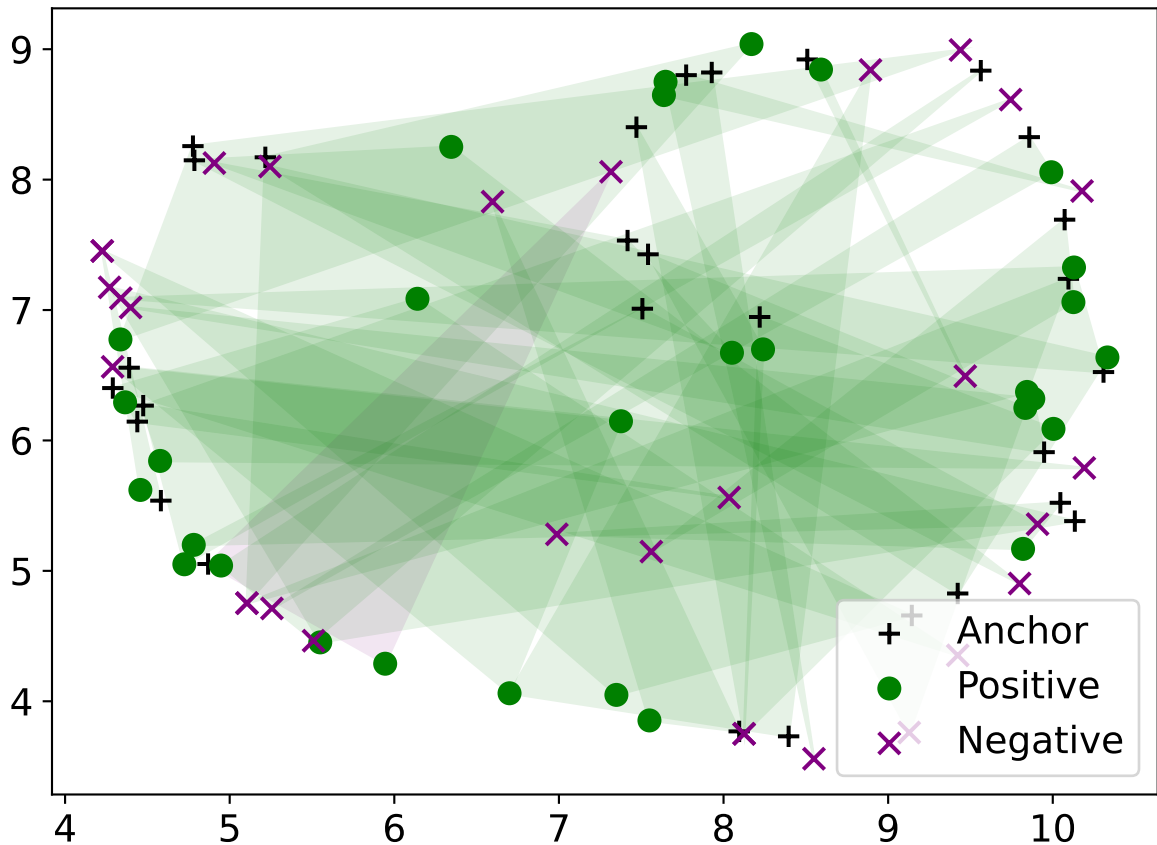

Supplement: SupplementaryMaterial [file embeddings_lstm_triplet_aug_dev_trackA_embeddings_with_labels.pdf › latex/fig/embeddings_lstm_triplet_aug_dev_trackA_embeddings_with_labels.pdf]

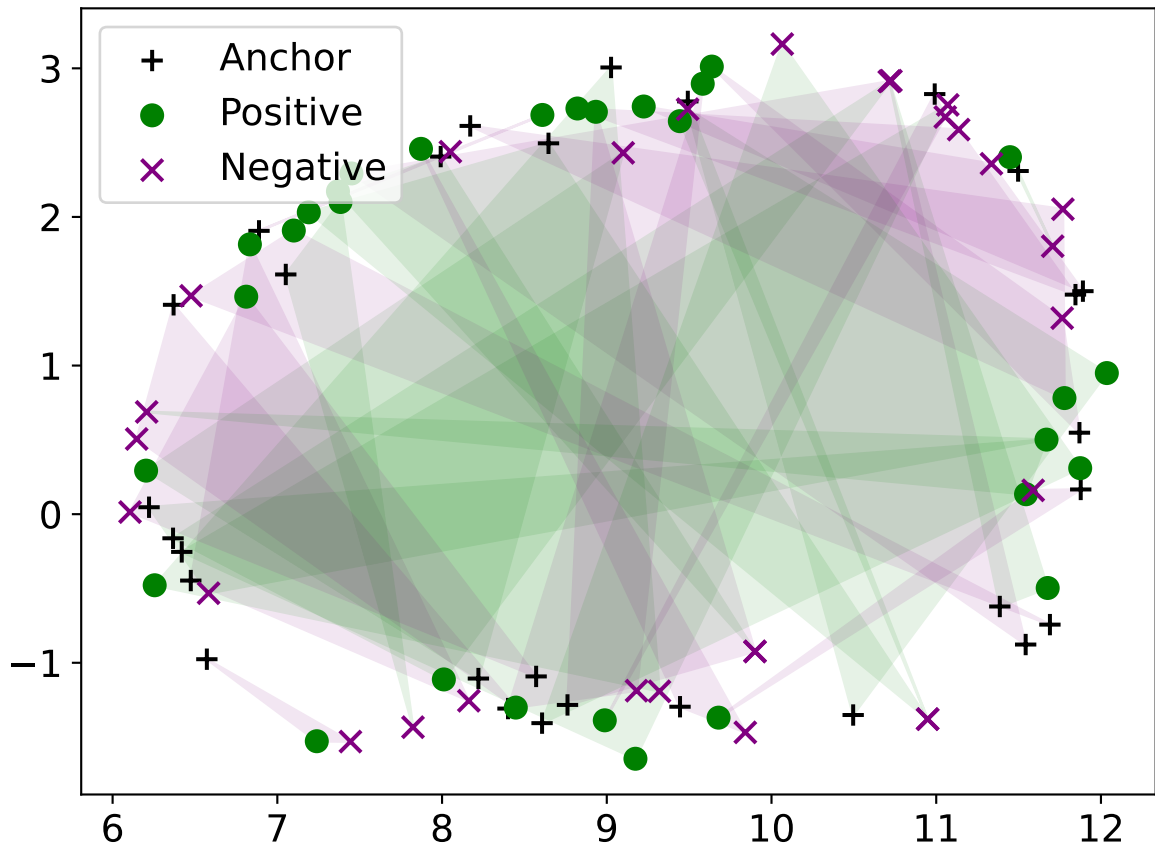

Supplement: SupplementaryMaterial [file embeddings_sbert_all-MiniLM-L12-v2_trackA_embeddings_with_labels.pdf › latex/fig/embeddings_sbert_all-MiniLM-L12-v2_trackA_embeddings_with_labels.pdf]

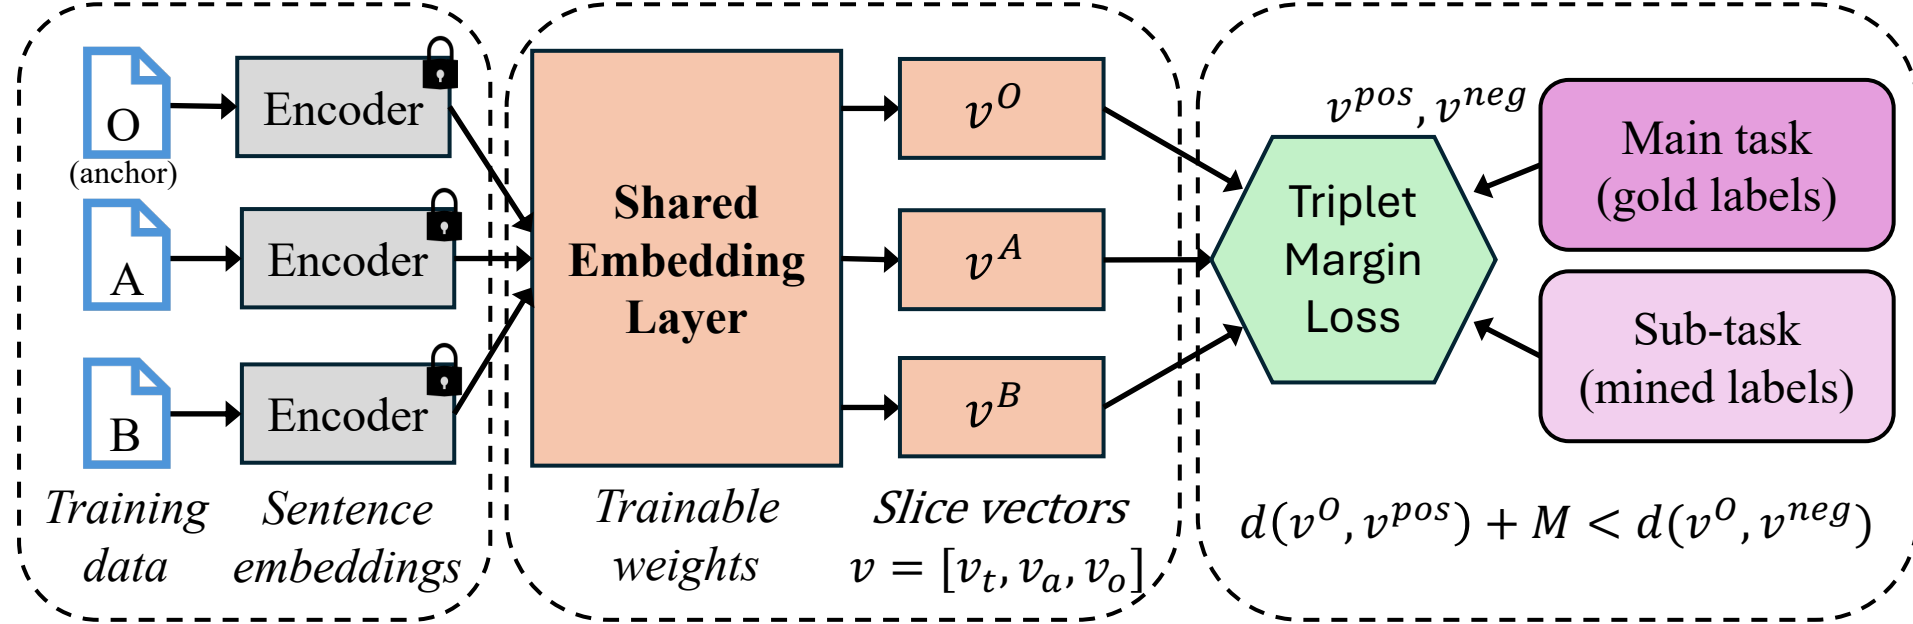

Supplement: SupplementaryMaterial [file overview_2col.pdf › latex/fig/overview_2col.pdf]

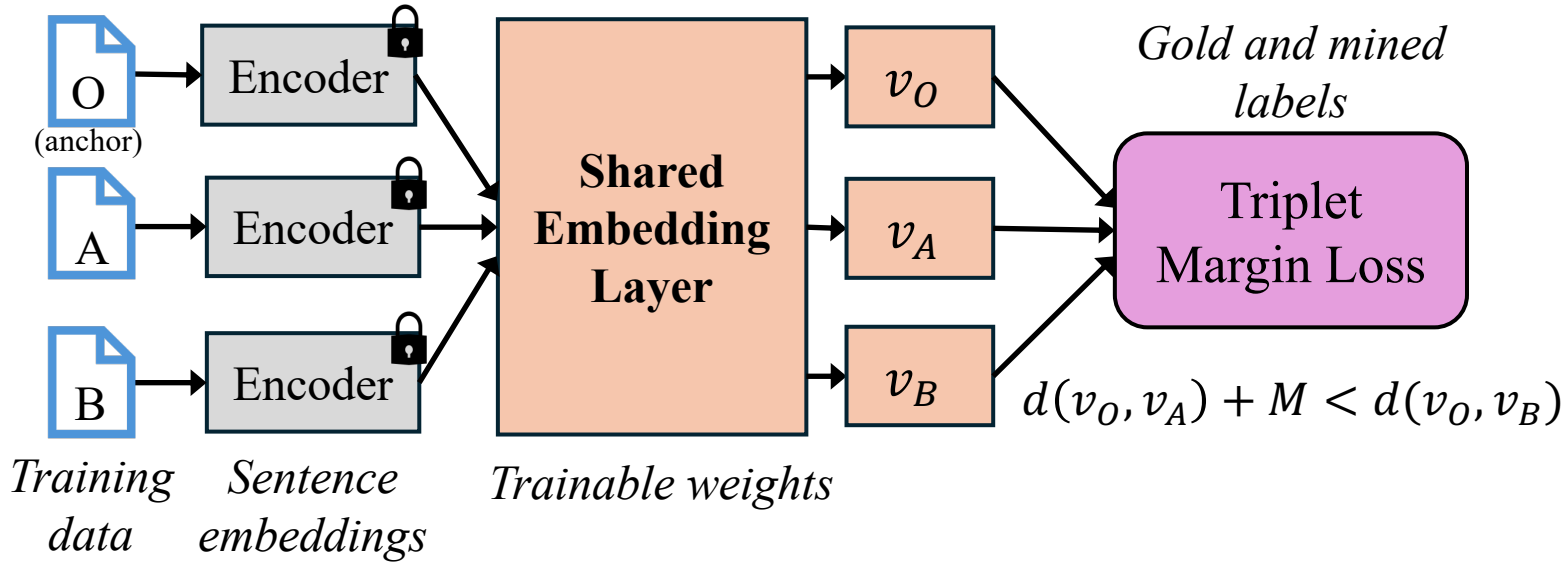

Supplement: SupplementaryMaterial [file overview.pdf › latex/overview.pdf]
